# Supplementary material
Source: Springer Nature journal article supplement (https://www.springermedizin.de/resource/supplementary/12936_2012_2533_MOESM6_ESM.pdf/9543200)

## 90% Mortality

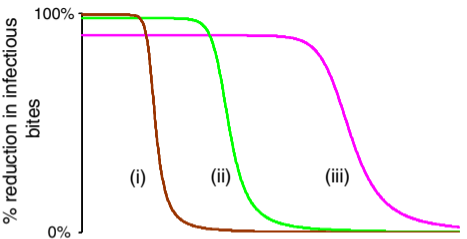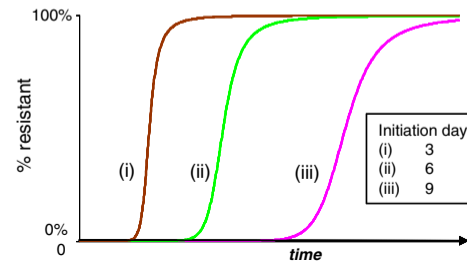

## Day 6 Initiation

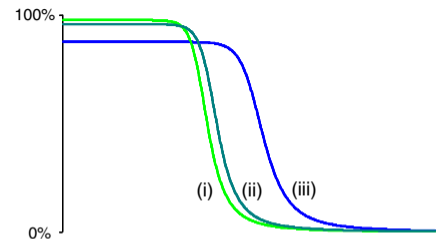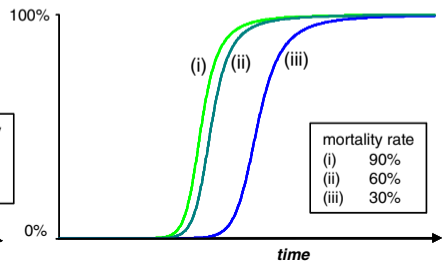

Supplement: MOESM6 [file 9543200]
